# Supplementary material
Source: PubMed Central journal article supplement (PMC3943321)
Supplement: supp_2013.093047_2013.093047.Lian_suppl.pdf [file supp_2013.093047_2013.093047.Lian_suppl.pdf]

## Loss of ATE1-mediated arginylation leads to impaired platelet myosin phosphorylation, clot retraction, and *in vivo* thrombosis formation

Lurong Lian,<sup>1</sup> Aae Suzuki,<sup>1</sup> Vincent Hayes,<sup>2</sup> Sougata Saha,<sup>3,5</sup> Xuemei Han,<sup>4</sup> Tao Xu,<sup>4,6</sup> John R Yates, III,<sup>4</sup> Mortimer Poncz,<sup>2</sup> Anna Kashina,<sup>3</sup> and Charles S. Abrams<sup>1</sup>

<sup>1</sup>Hematology-Oncology Division, Department of Medicine, Perelman School of Medicine, University of Pennsylvania, Philadelphia, PA, USA; <sup>2</sup>Department of Pediatrics, Children's Hospital of Philadelphia, USA; <sup>3</sup>Department of Animal Biology, School of Veterinary Medicine, University of Pennsylvania, Philadelphia, PA, USA; <sup>4</sup>Department of Chemical Physiology, The Scripps Research Institute, La Jolla, CA, USA; <sup>5</sup>Tezpur University, Napaam, India; and <sup>6</sup>Dow AgroSciences LLC, Indianapolis, IN, USA

---

©2014 Ferrata Storti Foundation. This is an open-access paper. doi:10.3324/haematol.2013.093047

Manuscript received on June 17, 2013. Manuscript accepted on November 27, 2013.

Correspondence: [abrams@mail.med.upenn.edu](mailto:abrams@mail.med.upenn.edu)

# Supplemental Table 1

| Accession      | Description                                                       | Arginylated site | Peptide                                             | XCorr  | DeltaCN | MPlusH   | CalcMPlusH | DeltaMass | SjScore   | p-value     | Confidence | FileName                    |
|----------------|-------------------------------------------------------------------|------------------|-----------------------------------------------------|--------|---------|----------|------------|-----------|-----------|-------------|------------|-----------------------------|
| NP_075631.2    | actin related protein 2/3 complex, subunit 1B                     | S343*            | C(170.1168)ISQFCTTGMDDGMSIWDVK.S                    | 4.6734 | 0.4732  | 2191.979 | 2189.9778  | -2.7      | 7.969751  | 0.413215085 | 100        | 080910WTPMA-11.367.367.2    |
| NP_598917.1    | actinin, alpha 1                                                  | I835             | K(156.1011)JLAGDKNYIETDEL.R                         | 4.558  | 0.2841  | 1906.007 | 1906.0028  | 1.9       | 4.7120957 | 0.968489883 | 100        | platelet-5.3905.3905.2      |
| NP_031466.2    | arachidonate 12-lipoxygenase                                      | L311             | K(156.1011)LLPMAIQIPNPSSPAPTLFLPSDPLLWLLAK.I        | 5.914  | 0.4923  | 3793.123 | 3790.1128  | 0         | 8.241585  | 0.313875145 | 100        | platelet-16.12430.12430.3   |
| NP_862897.1    | fibrinogen beta chain                                             | H449             | K(156.1011)JHGTDGQVVMWVK.G                          | 3.8005 | 0.2859  | 1701.796 | 1700.7961  | -2        | 6.0415154 | 0.67659321  | 100        | 080910WTPMA-12.6464.6464.2  |
| NP_034357.2    | filamin, alpha                                                    | P2143*           | A(170.1168)PSVANIISHCDLSLKIPESIQDMTAQVTPSPGK.T      | 4.4954 | 0.3566  | 3751.932 | 3750.9153  | 3.6       | 6.351275  | 0.408654758 | 99.8       | platelet-11.7291.7291.4     |
|                |                                                                   | Y2493            | K(156.1011)YGGPYHIGGSPFK.A                          | 3.2011 | 0.2789  | 1537.79  | 1535.7754  | 4.9       | 4.946237  | 0.136686137 | 100        | platelet-14.3736.3736.2     |
|                |                                                                   | F2303            | K(156.1011)FNEHIPDPSFVVPVSPSGDAR.R                  | 5.1615 | 0.3957  | 2624.299 | 2623.29    | 2         | 6.256327  | 0.990884745 | 100        | platelet-6.6267.6267.3      |
| NP_032063.2    | fos-like antigen 2                                                | Y26              | S(156.1011)YSSGGGGQKFRVMPGSGSAFIPITNAITTSQDLQVMVQPT | 4.9101 | 0.3059  | 4516.206 | 4513.2026  | -1.6      | 4.6043887 | 0.06846069  | 100        | platelet-3.15819.15819.4    |
| NP_031464.1    | fructose-bisphosphate aldolase A                                  | F244             | K(156.1011)FSNIEIAMATVTLAR.R                        | 6.2268 | 0.4164  | 1809.93  | 1808.9324  | -2.9      | 7.0414934 | 0.350893061 | 100        | 080910WTPMA-10.5603.5603.2  |
| NP_032138.3    | guanosine diphosphate (GDP) dissociation inhibitor 2              | V30              | K(156.1011)VLHMDQNPYYGGESASITPLEDYK.R               | 7.1309 | 0.5348  | 2997.454 | 2996.4458  | 1.5       | 8.937426  | 0.807840624 | 100        | platelet-6.6825.6825.3      |
| NP_071705.2    | heat shock protein 5                                              | N83              | K(156.1011)NQLTSNPENTVFDAR.R                        | 3.3106 | 0.4132  | 1833.903 | 1833.9089  | -3.5      | 6.63242   | 0.201712464 | 100        | 080910WTPMA-6.3865.3865.2   |
| NP_032244.2    | hemoglobin alpha 1 chain                                          | V63              | K(156.1011)VADALANAAGLDLPGALSALSLHAHLK              | 4.6374 | 0.3083  | 3020.58  | 3019.5708  | 1.9       | 5.5295057 | 0.968489883 | 100        | platelet-10.8457.8457.3     |
| NP_444322.1    | lysyl-IRNA synthetase isoform 2                                   | I369             | K(156.1011)ITYPDPGPEGQAYEVDFTPPFR.R                 | 6.1081 | 0.5286  | 2892.294 | 2892.279   | 5.4       | 8.577643  | 0.081341053 | 100        | platelet-8.5406.5406.3      |
| NP_899099.2    | mKIAA0540 protein                                                 | P352*            | P(170.1168)PEGSDLATWLLTEPDVQV.V                     | 4.8655 | 0.3309  | 2288.155 | 2284.1455  | -1.8      | 6.266108  | 0.762265694 | 99.9       | 080910WTPMA-2.12692.12692.2 |
| NP_071855.2    | myosin, heavy polypeptide 9, non-muscle isoform 1                 | L1844            | K(156.1011)JKDVLQVEDER.R                            | 2.3485 | 0.2307  | 1613.903 | 1612.9016  | -1.2      | 4.2675695 | 0.967039588 | 98.8       | 080910WTPMA-11.3375.3375.2  |
| NP_034990.1    | myosin, light polypeptide 6, alkali, smooth muscle and non-muscle | V64              | K(156.1011)VLDFFFLMLOTQVAK.N                        | 4.214  | 0.2669  | 2046.117 | 2044.1049  | 2.8       | 5.586929  | 0.675329762 | 100        | platelet-10.9286.9286.3     |
| XP_001480531.1 | PREDICTED: similar to GTP-binding protein (smg p21B)              | E45*             | V(170.1168)EVDAQQCMLEILDTAGTEQFTAMRD                | 6.0396 | 0.3557  | 2930.375 | 2927.3696  | -1.5      | 6.508986  | 0.076554821 | 99.8       | platelet-8.11171.11171.3    |
| NP_035202.1    | profilin 1                                                        | T39              | K(156.1011)TFVSTPFAEYGVVGVQK.D                      | 4.4067 | 0.3899  | 1775.037 | 1773.0269  | 1.9       | 6.8232403 | 0.968489883 | 100        | platelet-7.6656.6656.3      |
| NP_033051.2    | RAS p21 protein activator 3                                       | Q782             | K(156.1011)QVIAAGVGTLEGEHAQYRL.R                    | 6.9754 | 0.5147  | 2055.077 | 2055.073   | 1.9       | 8.978428  | 0.968489883 | 100        | platelet-8.2743.2743.3      |
| NP_789807.1    | Rho GTPase activating protein 18                                  | N632*            | G(170.1168)NIGERCLDDTDHMKDLYQLNPAEWVVK.S            | 5.9448 | 0.1416  | 3559.735 | 3557.7263  | 0.7       | 5.4416122 | 0.515284027 | 99.8       | platelet-6.7800.7800.3      |
| NP_443205.1    | striatin, calmodulin binding protein 3                            | A781             | K(156.1011)AYIASAGADALAK.V                          | 3.4799 | 0.3743  | 1377.744 | 1377.7485  | -3.5      | 6.4240017 | 0.201712464 | 100        | 080910WTPMA-6.409.409.2     |
| NP_035710.2    | thrombospondin 1                                                  | G574*            | C(170.1168)GACPPGYSGNGIQCK.D                        | 4.1003 | 0.4045  | 1737.802 | 1735.8003  | -2.8      | 6.832743  | 0.381227277 | 99.9       | 080910WTPMA-6.12653.12653.2 |
| NP_035077.1    | transforming growth factor, beta 1                                | L342*            | A(170.1168)LYNQHNPGASASGCCVQALEPLPIVYVYGR.K         | 5.1112 | 0.3979  | 3644.837 | 3640.8152  | 2.2       | 6.256313  | 0.90980918  | 99.8       | platelet-7.9658.9658.3      |
| NP_659054.1    | transmembrane protein 40                                          | E2*              | M(170.1168)EASGSSQSGSGVHR.E                         | 2.654  | 0.2975  | 1847.847 | 1845.8434  | -1.8      | 4.9107823 | 0.762265694 | 99.6       | 080910WTPMA-6.5851.5851.2   |
|                |                                                                   | G111             | G(156.1011)GAAGENVPTGESGLR.R                        | 3.8962 | 0.3918  | 1588.793 | 1587.7908  | -0.7      | 6.8197827 | 0.743028266 | 99.9       | 080910WTPMA-6.3325.3325.2   |
| NP_058659.1    | tropomodulin 3                                                    | I173             | K(156.1011)JLVPFDEPPNPNVVEESL.R                     | 6.3407 | 0.4739  | 2297.212 | 2294.2026  | -0.2      | 8.954529  | 0.538971428 | 100        | 080910WTPMA-8.8264.8264.2   |
| NP_789830.1    | ubiquitin associated and SH3 domain containing, B                 | S601*            | C(170.1168)SCEELGETGIWQLTDPPLPLTHGPTGGFNWR.E        | 4.3971 | 0.3945  | 3751.857 | 3748.854   | -1.8      | 6.7648215 | 0.054377593 | 99.9       | platelet-13.14671.14671.3   |
| NP_035838.3    | von Willebrand factor                                             | V1409            | K(156.1011)VIVIPVGIQPHASLQ.Q                        | 3.5052 | 0.3164  | 1656.041 | 1656.0319  | 5.3       | 5.3865337 | 0.090640178 | 100        | platelet-15.5003.5003.3     |

\*Monomethylated Arg

## Supplemental Methods (online only)

### Reagents and Antibodies

Reagents: human fibrinogen (Enzyme Research Laboratories, #FIB3), prostaglandin E1 (PGE1) (Cayman Chemicals, #13010), collagen (Chrono-log, #385), human  $\alpha$  thrombin (kindly provided by Dr. Sriram Krishnaswamy, with the activity of 3000U per mg), protease inhibitor cocktail (Roche, San Francisco, PA), Convulxin (Enzo Life Sciences, Plymouth Meeting, PA), Fluor-phalloidin (Life Technology, Grand Island, NY), rProtein G agarose (life technologies, Cat# 15920-010), Anti-non-muscle Myosin IIA antibody ( Abcam, Cat# ab55456), and the reagents for plasma coagulation assays (Trinity Biotech, Carlsbad, CA). All other chemicals were purchased from Sigma-Aldrich (St. Louis, MO.)

Antibodies: anti-ATE1 (12, 18) and anti- $\beta$ -actin (Cell Signaling, Cat. #4870), anti-phospho-myosin light chain (pSer<sup>19</sup>) (Sigma-Aldrich, St. Louis, MO), anti-phospho-myosin light chain (pThr<sup>18</sup>) (Santa Cruz Biotechnology, CA), anti-myosin light chain (Sigma-Aldrich, St. Louis, MO), and anti-myosin IIA (Sigma-Aldrich, St. Louis, MO).

### Genotyping

The PCR primers used to genotype for the ATE1 deletion were LoxF 5' TGC CTC CAG CAT TGG ATG AA-3' and LoxR 5'- CCA TGG GTC TCC AAT TTG CA-3', or FrtR2 5'- AGA CAG GGC CTC ATC AAG TA -3'. The PCR primers used to genotype for the PF4-Cre strain were the forward primer, located at the PF4 promoter (5'- CCC

ATA CAG CAC ACC TTT TG-3') and the reverse primer, located at the Cre cDNA sequence (5'- TGC TAC AGT CAG CAG GTT-3').

### **Platelet Aggregation And Spreading**

Platelet aggregometry was performed as previously described (19). For studies of platelet spreading, glass coverslips were coated with either 100  $\mu\text{g/ml}$  fibrinogen or 30  $\mu\text{g/ml}$  collagen type I in tissue culture plates at 4° C overnight. The coverslips were washed three times with PBS and coated with 5% BSA at room temperature for 2 hours following two washes with PBS. Washed platelets were loaded onto the coverslip. The platelets were spread upon collagen or fibrinogen in the presence of either 1 U/ml thrombin or 500 nM PMA. Cell spreading was stopped by adding paraformaldehyde to a final concentration of 3.7% and then, permeabilized with 0.1% Triton X-100. The cells were stained with Alexa Fluor<sup>®</sup> phalloidin and probed with antibodies directed against  $\beta$  or  $\gamma$  - actin. The static platelet spreading images were taken by using the Nikon Image System and IP Lab Software. The area of cell spreading and the quantification of total F-actin and  $\beta$  or  $\gamma$  – actin were analyzed with NIH Image J software. Platelet adhesion was performed as described by Eriksson and colleagues (7).

### **Clot retraction**

Platelet rich plasma was prepared by collecting blood with 1:10 3.8% sodium citrate via the vena cava and followed by spinning the blood at 200 g for 7 minutes. The platelets were pelleted by spinning the PRP at 1000 g for 10 minutes, while the

platelet poor plasma supernatant was reserved for resuspending platelets and adjusting platelet density to  $3 \times 10^8$  cells/ml. The platelet suspension was supplemented with 1mM  $\text{CaCl}_2$  and incubated at  $37^\circ\text{C}$  for 5 minutes in a water bath without shaking. Clot retraction took place by adding 10 U/ml of human thrombin followed by a gentle mix and incubation in a  $37^\circ\text{C}$  water bath. The clot retraction was photographed at several time points during the full observation time. The percentage of clot retraction was quantified based on the 2D-image by using NIH Image J Software.

### **Carotid Artery Thrombosis Induced By $\text{FeCl}_3$**

Six to eight week old mice (18-25 g) were used for these studies. This procedure has been previously described (22, 23).

### **Plasma Coagulation Assays**

Mouse citrated platelet poor plasma (PPP) was prepared from blood collected via the vena cava with 3.8% sodium citrate and separated by centrifugation at 800g for 20 minutes at room temperature. Prothrombin time (PT) and activated partial thromboplastin (aPTT) assays were performed using 50  $\mu\text{l}$  PPP diluted in buffer (10mM Tris, 150mM NaCl, 0.01% BSA) at 1:1, mixed with the TriniClot PT excel reagents for the PT assay or with the TriniClot automatic aPTT for the aPTT assay by following the manufacturer's instructions. PT or aPTT time was measured at  $37^\circ\text{C}$  with the Diagnostica Stago SArt 4 Hemostasis Analyzer.
