# Supplementary material
Source: PubMed Central journal article supplement (PMC3943321)

# Loss of ATE1-mediated arginylation leads to impaired platelet myosin phosphorylation, clot retraction, and in vivo thrombosis formation

Arginylated light chain:  
normal conformation

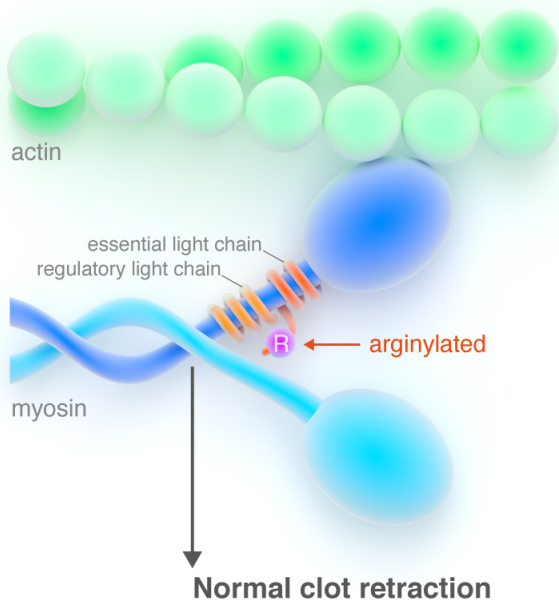

Non-arginylated light chain:  
hyper-active conformation

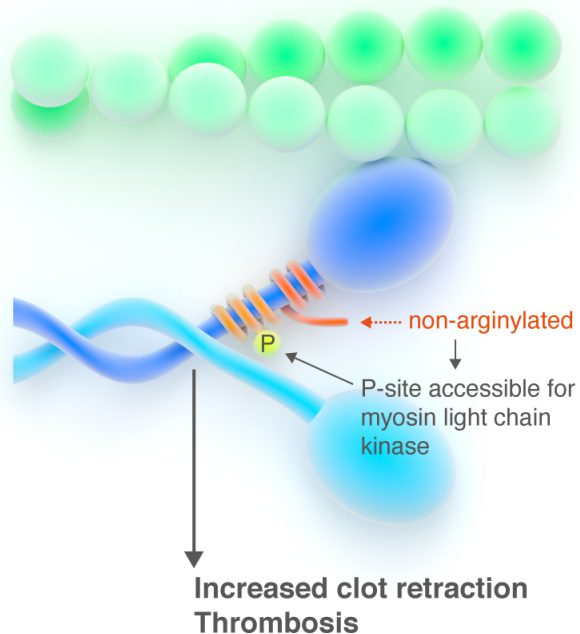

Supplement: supp_2013.093047_GA_Lian_v5-01.pdf [file supp_2013.093047_GA_Lian_v5-01.pdf]
